# Supplementary material for: The Recovery After COVID-19 in Nursing Home Residents
Source: PubMed Central journal article supplement (PMC9005824; doi:10.1177/23337214221094192), 2022-04-11
Supplement: sj-pdf-1-ggm-10.1177_23337214221094192.pdf [file sj-pdf-1-ggm-10.1177_23337214221094192.pdf]

## **Supplementary**

Table of contents:

- A. Prevalence of COVID-19 symptoms
- B. Mean functioning of different domains (ADL, cognition, social)
- C. Mean functioning of different domains (ADL, cognition, social) stratified for dementia
- D. Statistical analysis of the differences in baseline characteristics between the different trajectories

### ***Supplement A – Prevalence of COVID-19 symptoms***

| <b>Symptomatology<br/>% (n)</b> | <b>T0</b>  | <b>T1</b>  | <b>T2</b>  | <b>T3</b>  |
|---------------------------------|------------|------------|------------|------------|
| <i>Fatigue</i>                  | 48.8% (42) | 87.2% (75) | 79.1% (68) | 68.6% (59) |
| <i>Sleeping behaviour</i>       | 43.0% (37) | 73.3% (63) | 64% (55)   | 60.5% (52) |
| <i>Cough</i>                    | 22.1% (19) | 70.9% (61) | 31.4% (27) | 17.4% (15) |
| <i>Dyspnoea</i>                 | 22.1% (19) | 47.7% (41) | 40.7% (35) | 27.9% (24) |
| <i>Loss of smell/taste</i>      | 1.2% (1)   | 29.1% (25) | 12.8% (11) | 4.7% (4)   |

### ***Supplement B – Mean functioning of different domains (ADL, cognition, social)***

| <b>Functioning<br/>mean (SE)</b> | <b>T0</b>   | <b>T1</b>   | <b>T2</b>   | <b>T3</b>   |
|----------------------------------|-------------|-------------|-------------|-------------|
| <i>ADL (ADL-HS)</i>              | 2.51 (0.16) | 3.35 (0.16) | 2.93 (0.16) | 2.77 (0.16) |
| <i>Cognition (CPS)</i>           | 2.51 (0.19) | 3.33 (0.20) | 2.77 (0.19) | 2.66 (0.19) |
| <i>Social (RISE)</i>             | 4.55 (0.19) | 3.22 (0.24) | 4.13 (0.22) | 4.31 (0.21) |

**Supplement C – Mean functioning of different domains (ADL, cognition, social) stratified for dementia**

**Supplement D - Statistical analysis of the differences in baseline characteristics between the different trajectories**

To assess whether there were differences in baseline characteristics between the residents who were not or only partially recovered compared to residents who did recover, we ran some additional analyses. Given the relatively small sample size, we ran the analyses on the 'overall recovery' variable (all function domains and all symptoms combined). Since, there were only 4 residents who did not recover, we decided to combine this group with the partial recovery group (N=48) and compared this combined group (N=56) ('no recovery' & 'partial recovery') to the completely recovered group (N=26). We performed a chi-squared statistical test to evaluate significant baseline differences between the residents who recovered and those who did not or partially recovered. There were no significant differences between the residents. See the table below for the results.

|                  |               | <b>No/Partial recovery</b> | <b>Recovery</b> | P-value (chi-squared) |
|------------------|---------------|----------------------------|-----------------|-----------------------|
|                  |               | N = 52                     | N = 26          |                       |
| Age              |               | 84 (SD 9)                  | 82 (9)          | 0.383                 |
| Gender           | Female        | 38 (73.1%)                 | 20 (76.9%)      | 0.714                 |
| Estimated weight | Underweight   | 5 (9.6%)                   | 1 (3.8%)        | 0.653                 |
|                  | Normal weight | 33 (63.5%)                 | 17 (65.4%)      |                       |
|                  | Overweight    | 14 (26.9%)                 | 8 (30.8%)       |                       |
| Dementia         |               | 38 (73.1%)                 | 18 (69.2%)      | 0.722                 |
| Type of dementia | Alzheimer's   | 20 (52.6%)                 | 6 (33.3%)       | 0.210                 |
|                  | Vascular      | 3 (7.9%)                   | 5 (27.8%)       |                       |

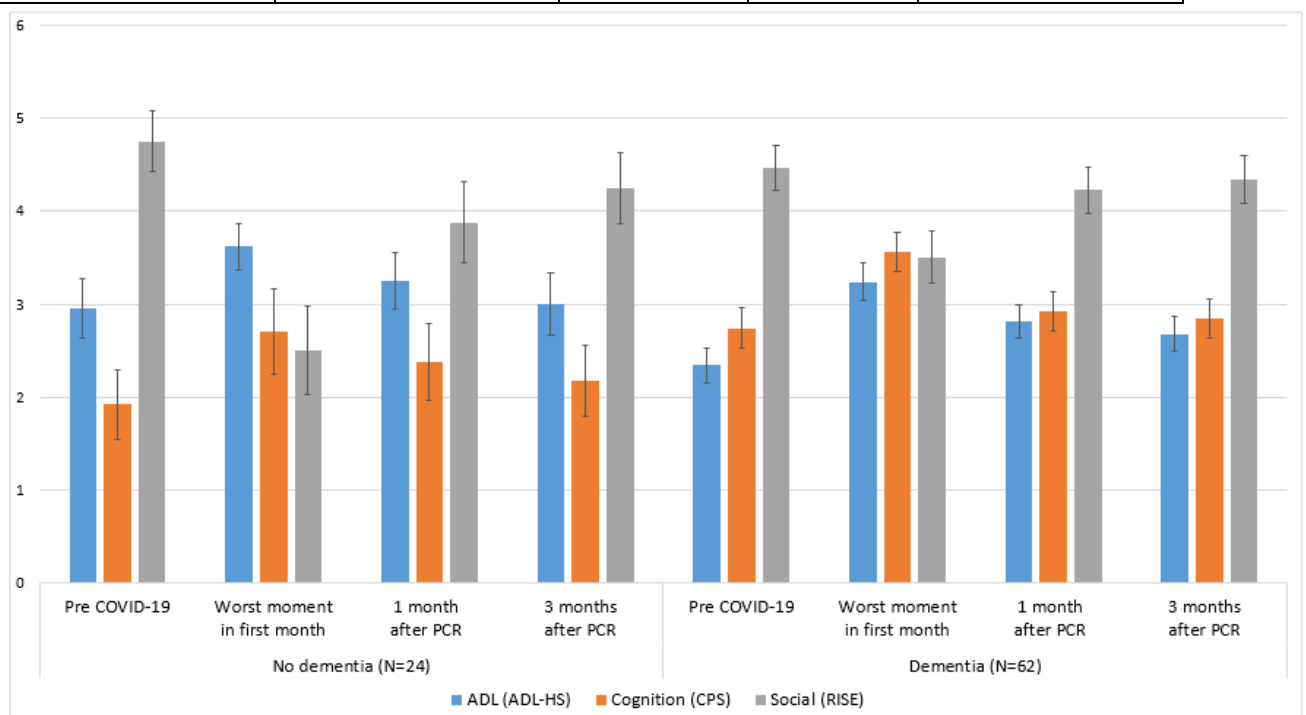

|                                               |             |            |            |       |
|-----------------------------------------------|-------------|------------|------------|-------|
|                                               | Mixed       | 6 (15.8%)  | 2 (11.1%)  |       |
|                                               | Lewy Body   | 0 (0%)     | 0 (0%)     |       |
|                                               | Parkinson's | 1 (2.6%)   | 0 (0%)     |       |
|                                               | Unspecified | 8 (21.1%)  | 5 (27.8%)  |       |
| Severity of dementia                          | Mild        | 1 (2.6%)   | 0 (0%)     | 0.161 |
|                                               | Moderate    | 22 (57.9%) | 15 (83.3%) |       |
|                                               | Severe      | 15 (39.5%) | 3 (16.7%)  |       |
| Psychiatric disease                           |             | 16 (30.8%) | 9 (34.6%)  | 0.732 |
| Cardiovascular disease (incl. CVA)            |             | 35 (67.3%) | 22 (84.6%) | 0.104 |
| Diabetes Mellitus                             |             | 7 (13.5%)  | 3 (11.5%)  | 0.811 |
| Renal insufficiency (eGFR <60)                |             | 9 (17.3%)  | 8 (30.8%)  | 0.175 |
| Pulmonary disease                             |             | 12 (23.1%) | 5 (19.2%)  | 0.698 |
| Neurological disease (excl. CVA and dementia) |             | 11 (21.2%) | 6 (23.1%)  | 0.864 |
